# Understanding the primary healthcare context in rural South and Southeast Asia: a village profiling study

## Authors and affiliations

Rusheng Chew<sup>\*,1,2,3</sup> Sazid Ibna Zaman<sup>\*,1,4</sup> Mst. Asfat Ara Joly<sup>4</sup> Didar Uddin<sup>1</sup> Md Nurullah<sup>4</sup> James J Callery<sup>1,2</sup> Carlo Perrone<sup>1,5</sup> Thomas J Peto<sup>1,2</sup> Koukeo Phommason<sup>6</sup> Aung Pyae Phy<sup>7</sup> Wanlapa Roobsoong<sup>8</sup> Aninda Sen<sup>9</sup> Moul Vanna<sup>10</sup> Arjun Chandna<sup>2,11</sup> Tiengkham Pongvongsa<sup>12</sup> Lek Dysoley<sup>13</sup> Nicholas PJ Day<sup>1,2</sup> Yoel Lubell<sup>1,2</sup> Richard J Maude<sup>1,2,14</sup> (\*contributed equally)

<sup>1</sup>Mahidol Oxford Tropical Medicine Research Unit, Bangkok, Thailand; <sup>2</sup>Centre for Tropical Medicine and Global Health, University of Oxford, Oxford, UK; <sup>3</sup>Faculty of Medicine, University of Queensland, Brisbane, Australia; <sup>4</sup>GroupMappers, Dhaka, Bangladesh; <sup>5</sup>Chiang Rai Clinical Research Unit, Chiang Rai, Thailand; <sup>6</sup>Lao-Oxford-Mahosot Hospital-Wellcome Trust Research Unit, Vientiane, Laos; <sup>7</sup>Shoklo Malaria Research Unit, Mae Sot, Thailand; <sup>8</sup>Mahidol Vivax Research Unit, Mahidol University, Bangkok, Thailand; <sup>9</sup>BRAC, Dhaka, Bangladesh; <sup>10</sup>Action for Health Development, Battambang, Cambodia; <sup>11</sup>Cambodia Oxford Medical Research Unit, Siem Reap, Cambodia; <sup>12</sup>Savannakhet Provincial Health Office, Savannakhet, Laos; <sup>13</sup>National Center for Parasitology, Entomology, and Malaria Control, Phnom Penh, Cambodia; <sup>14</sup>Open University, Milton Keynes, UK

## Corresponding author details

Dr Rusheng Chew, Mahidol Oxford Tropical Medicine Research Unit, 3rd floor 60th Anniversary Chalermprakit Building, 420/6 Ratchawithi Road, Ratchathewi, Bangkok 10400, Thailand. Email: [chris@tropmedres.ac](mailto:chris@tropmedres.ac) Phone: +66 2 203 6333

## Author contributions

Conceptualisation: RC, SIZ, RJM, AC, YL; data curation: SIZ, DU, MN, MAAJ; formal analysis: RC, SIZ; investigation and validation: JJC, CP, TJP, KP, APP, WR, AS, MV; methodology: RC, SIZ, RJM, YL; software: SIZ, MN, MAAJ; resources: TP, LD; supervision: NPJD, RJM, YL; visualisation: SIZ; writing – original draft: RC; writing – review and editing: SIZ, DU, MN, MAAJ, JJC, CP, TJP, KP, APP, WR, AS, MV, AC, TP, LD, NPJD, RJM, YL

## Key words

Village profiling; context; South Asia; Southeast Asia

## Word count

4,151

## 1 **Abstract**

2 The use of comprehensive village profiles is one way of characterising contextual factors important for  
3 the implementation of primary healthcare interventions and service planning in rural areas. However,  
4 there are few such data available at the village level in rural South and Southeast Asia. This study aimed  
5 to address this gap, as well as compare high-level data from representative under-served and under-  
6 studied villages across seven sites in five countries (Thailand (n=3), Cambodia, Laos, Myanmar, and  
7 Bangladesh). A survey-based approach using key informants supplemented by other relevant  
8 information sources was used to collect data from 687 of 707 villages participating in the South and  
9 Southeast Asian Community-based Trials Network. Data on four key health and socio-economic  
10 indicators (literacy rate, percentage of attended deliveries, percentage of fully-immunised children, and  
11 percentage of latrine coverage) as well as access to health services, public utilities, and education were  
12 collected and analysed using descriptive statistics. There was considerable variation between sites in  
13 terms of health and socio-economic indicators given that the countries are at different stages of  
14 development, and also between the three sites in Thailand. Five of the seven sites were highly diverse  
15 ethno-culturally and linguistically, and all were reliant on primary health centres as well as village health  
16 workers/village malaria workers as the main providers of primary healthcare. These were generally  
17 bypassed by severely ill patients in favour of first-level referral hospitals and private sector facilities in  
18 towns. While >75% of villages at each site were near to a primary school, educational attainment was  
19 generally low. Over 70% of villages at each site had mobile phone coverage and availability of electricity  
20 was high ( $\geq 65\%$  at all sites bar Myanmar). These results illustrate the wide diversity of villages in rural  
21 South and Southeast Asia that need to be considered in public health research and policymaking.

## 22 **Introduction**

23 An understanding of contextual factors is crucial to the successful implementation of interventions to  
24 improve healthcare delivery. Although there is no one standard definition of ‘context’ as it relates to  
25 healthcare,[1] one useful definition is the “situational opportunities and constraints that affect the  
26 occurrence and meaning of organizational behaviour as well as functional relationships between  
27 variables”,[2] indicating that context necessarily includes both internal and external inter-related  
28 factors.[3]

29 In rural South and Southeast Asia, healthcare is principally delivered at the village, or village group, level  
30 through village health workers and primary health centres, with referral facilities typically being distant  
31 and relatively difficult to access.[4, 5] As such, interventions targeting primary healthcare would be  
32 expected to produce maximum impact. Nevertheless, as previous experience with primary health  
33 centres in India has shown, despite the apparent basing of health service provision on the principles of  
34 equity and administrative accountability, not catering to local contextual variations between villages and  
35 not involving local staff in service planning resulted in sub-optimal healthcare delivery.[6] The key  
36 variables identified relate to service coverage and socio-economic and geographical factors,[6] the  
37 determination of which have the benefit of being useful for micro-planning i.e., planning of health  
38 services and interventions at the village or sub-district level.[7]

39 Constructing concise yet comprehensive village profiles which contain relevant key indicators is one way  
40 of characterising contextual factors important for the implementation of primary healthcare  
41 interventions and service planning. Such indicators must be as simple as possible, widely accepted, and

42 highly applicable to the village setting. They should also be easily comparable, sensitive to change, and  
43 yield data which is meaningful and easy to analyse.[8]

44 While governmental authorities may have village-level data on some of these indicators, these may not  
45 be available from a single source and may not be current, especially as access to rural and remote  
46 locations is difficult. Correspondingly, there is also scant published research which aimed to depict the  
47 rural South and Southeast Asian primary healthcare context via the profiling of representative villages,  
48 let alone research which aimed to compare high-level village profiling data across countries. This study  
49 aimed to fill these knowledge gaps, primarily to understand better the findings of a large-scale  
50 observational study on the epidemiology of acute febrile illness in the region in which patients were  
51 recruited from the selected villages,[9] but also to use the profiles to plan future research and guide  
52 policy-making.

## 53 **Methods**

### 54 **Setting**

55 This study was carried out across 687 of the 710 villages forming part of the South and Southeast Asian  
56 Community-based Trials Network (SEACTN), which spans seven sites across five countries (Thailand,  
57 Laos, Cambodia, Bangladesh, and Myanmar) (Figure 1). The sites are located in rural districts of the  
58 following locations: Chiang Rai, Tak, and Yala provinces, Thailand; Savannakhet province, Laos;  
59 Chattogram division, Bangladesh; Battambang and Pailin provinces, Cambodia; and Karen state,  
60 Myanmar. A full description of SEACTN is available in the open letter announcing its launch.[9] Every  
61 village included in SEACTN was profiled, with the exception of 20 villages in Tak province, Thailand, and  
62 three villages in Karen state, Myanmar which were not studied due to logistical difficulties and security  
63 concerns, respectively.

64 Participating villages were selected for inclusion in SEACTN by country implementing partners, who have  
65 the most knowledge to determine which villages are representative of the areas where the target  
66 populations for the observational study and other SEACTN project components reside, and where  
67 prospective, directly-collected data would be most useful. Of note, one of the primary objectives of  
68 establishing SEACTN, which was to map and describe health services in under-served and under-studied  
69 rural and remote areas of South and Southeast Asia, was a guiding principle in selecting villages.

70 An exception was made for the Myanmar site due to the ongoing armed conflict in Karen state,[10]  
71 resulting in the need to reduce inaccessibility to ensure the viability of conducting other SEACTN  
72 activities. Therefore, while all villages profiled were rural, these were in the area near the Thai border  
73 rather than in the interior of Karen state, and better connected to transport and communication  
74 infrastructure. Because of this, and their borderland location, residents of these villages were also able  
75 to access facilities in Thailand, in particular health services.

### 76 **Study design**

77 Similar to previous studies which collected data on key health indicators,[11] we adopted a survey-  
78 based study design, with key informants used as respondents. These key informants were identified by  
79 site research staff, and included healthcare workers, village leaders, and villagers who were judged to  
80 have the requisite knowledge. Other data sources were used as relevant; these included Global  
81 Positioning System (GPS) data, census data, and published government documents e.g., official statistics.

## 82 Questionnaire development

83 The survey questionnaire was developed iteratively through a series of discussions with senior  
84 researchers from each site. This approach was taken to ensure that only relevant and useful data were  
85 collected and, for questions where respondents were presented with options from which to select, the  
86 options were tailored to site-specific conditions.

87 The questionnaire consisted of four sections covering village location, socio-economic conditions, health  
88 services and infrastructure, and public utilities. Questions on key health and socio-economic indicators  
89 were adapted from the indicators of resources and service performance identified by Larson and Mercer  
90 as being well-defined, valid, feasibly collected, and useful i.e., literacy rate, percentage of attended  
91 deliveries, percentage of fully-immunised children, and percentage of latrine coverage.[8]

92 Given country-specific differences in the definition of literacy, a proxy measure of completion of at least  
93 five years' schooling in adults aged  $\geq 18$  years was used instead. As per the World Health Organization,  
94 an attended birth was defined as one presided over by a skilled birth attendant i.e., an accredited health  
95 professional, such as a midwife, doctor or nurse, who has been educated and trained to proficiency in  
96 the skills needed to manage normal uncomplicated pregnancies, childbirth and the immediate postnatal  
97 period, and in the identification, management and referral of women and neonates for complications.  
98 Traditional birth attendants, whether trained or not, are not classed as skilled birth attendants.[12] A  
99 fully immunised child was defined as one who has received the following vaccines: Bacille Calmette-  
100 Guérin; three doses of diphtheria, pertussis, and tetanus; three doses of polio; and measles by the age  
101 of one year.[8] Estimates for educational attainment, skilled birth attendance, and vaccine coverage  
102 were obtained by asking key informants to consider a representative sample of 20 persons relevant to  
103 the question, thus are rounded to the nearest 5% at the point of data collection.

104 The WHO/United Nations Children's Fund Joint Monitoring Program for Water Supply, Sanitation, and  
105 Hygiene (WHO/UNICEF JMP) defines 'improved drinking water sources' as those that are likely to be  
106 protected from outside contamination, particularly faeces. Examples include household connections,  
107 public standpipes, boreholes, and protected dug wells.[13] The WHO/UNICEF JMP also distinguishes  
108 between 'improved' and 'unimproved sanitation facilities', with the former defined as those that  
109 hygienically separate human waste from human contact including flush or pour-flush to piped sewer  
110 systems, septic tank pit latrines, ventilated-improved pit latrines, or pit latrines with slab or composting  
111 toilets. Importantly, shared or public-use sanitation facilities are not considered to be improved.[13] To  
112 describe access to health services and other relevant infrastructure and public utilities, key informants  
113 were asked to list the services available in the village or within 30 minutes' walk of their residence. This  
114 30-minute travel time was chosen as it has been widely used to define appropriate accessibility.[14, 15]

115 The survey questionnaire template, which formed the basis for the study electronic data collection tool  
116 described in the next section, is shown in Supporting Information S1.

## 117 Data collection instrument and procedures

118 An electronic version of the survey questionnaire was developed using KoboToolbox (Kobo Organization,  
119 Cambridge, USA) and loaded onto tablet devices. Data collection was then carried out electronically for  
120 each village by site research staff using a combination of visits to the village, telephone interviews, and

121 desk-based research. Village population figures were obtained from the latest available official statistics;  
122 for villages where these were not available, estimates were obtained through key informant interviews.

123 Key informants were interviewed either in person or by telephone. At sites where more than one key  
124 informant was interviewed per village, the mean of the responses to questions requiring numerical  
125 answers was entered as the final value if the responses were broadly similar. Otherwise, research staff  
126 were allowed to use their discretion in selecting the preferred response based on how well-suited the  
127 knowledge and expertise of the key informant was to the question e.g., the response of a health worker  
128 key informant would be preferred over that of a village head for the question on percentage of attended  
129 deliveries.

### 130 **Statistical analysis**

131 Data were analysed and presented using descriptive statistics to depict an ‘average’ village for each site.  
132 Count data at the site level were reported directly, while medians and upper and lower quartiles were  
133 calculated for continuous data captured at the village level. Percentages were calculated for binary and  
134 categorical data captured at the village level.

135 Responses to questions requiring the selection of one or more responses e.g., types of water source  
136 available at each village, were summarised graphically to show the proportion of villages per site with  
137 access to a particular service. Analyses were carried out using Excel (Microsoft, Redmond, USA).

### 138 **Ethical approval**

139 Ethical approval was not required for this study.

### 140 **Results**

141 The locations of the villages profiled in this study within each study site are shown in Figure 2.

#### 142 **Demographic details and health and socio-economic status indicators**

143 Site-specific demographic and health and socio-economic status indicator data are shown in Table 1.

144 In the profiled SEACTN villages, the median village population for any given site ranged between 345  
145 and 902 people. There was a high level of cultural, religious, and linguistic diversity with several  
146 languages being spoken and religions practised at all sites, except in Cambodia and Yala province of  
147 Thailand which were more homogenous.

148 In general, the median percentage of adults with five years’ schooling was no greater than 75% except in  
149 Cambodia where this figure was 100%. There was little difference in educational attainment between  
150 genders except in Yala province, Thailand, where a median of 70% of females had achieved this level of  
151 education compared to 50% of males.

152 Except for Chiang Rai and Yala provinces in Thailand, latrine coverage did not exceed the 90% threshold  
153 generally accepted as the coverage required to have a positive impact on the health of the  
154 community.[16] Latrine coverage was particularly low in Bangladesh at 67.5%.

155 Vaccination coverage was low in Myanmar and Yala (median coverage of 75% and 67.5%, respectively)  
156 relative to other sites which had near-perfect coverage.

157 **Access to health services**

158 The percentage of villages with access to a health facility within 30 minutes' walk was highly variable,  
159 ranging from 28.4% in Laos to 100% in Myanmar. The travel times to the nearest health facility for  
160 villages with no facility within 30 minutes' walk ranged between 15–90 minutes by motor vehicle. The  
161 median percentage of deliveries attended by skilled birth attendants was also markedly lower in  
162 Bangladesh (60%) compared to other sites.

163 As might be expected, few villages at all sites had access to doctors; the percentage of villages which  
164 had a doctor on site or within 30 minutes' walk ranged from 4.2% in Yala to 20.0% in Myanmar (Figure  
165 3a). By far the commonest types of health worker in the studied villages were primary health centre  
166 (PHC) workers/nurses and village health workers/village malaria workers (VHWs/VMWs). Interestingly,  
167 traditional healers were not found in most villages across all sites with the exception of Yala, where  
168 70.8% of villages have them. All villages had access to a healthcare worker. Nevertheless, it should be  
169 borne in mind that many healthcare providers are informal, with little or no official training. These  
170 informal healthcare providers were found in 63.1% and 77.1% of villages in Bangladesh and Myanmar,  
171 respectively and do not include traditional healers or traditional birth attendants; however, in all of the  
172 villages where they were present, there was also at least one type of formal healthcare provider.

173 It should be of little surprise given the above findings that most facility-based healthcare in the profiled  
174 villages was delivered at PHCs (Figure 3b), and that where they are not, such as in Yala and Laos where  
175 there are few PHCs, the burden of primary healthcare delivery falls on VHWs/VMWs. This is most  
176 important in Laos, where 71.6% of villages had no healthcare facility, including pharmacies or medicine  
177 shops, within 30 minutes' walk. Notably also, in Myanmar 77.1% of villages were served by clinics set up  
178 by non-governmental organisations (NGOs) vs. 11.4% served by government PHCs. It is also important to  
179 note the relatively easy access to pharmacies or medicine shops at all sites except Chiang Rai and Laos,  
180 especially since medicines are generally available over the counter.

181 As shown also in Figure 3b, there are no secondary care facilities able to care for severely ill patients  
182 within 30 minutes' walk of any profiled village, with all easily accessible healthcare facilities being  
183 designed for the provision of basic primary care and/or diagnosis and treatment of uncomplicated  
184 malaria, in the case of malaria posts. It is, therefore, not unexpected that patients who perceive  
185 themselves as being severely unwell would generally primarily seek care from first-level referral  
186 hospitals i.e., those at the sub-district and district levels, with the exception of Yala, Cambodia, and  
187 Bangladesh (Figure 3c). At these three sites, the commonest facility to which severely unwell patients  
188 would present remains the PHC; this was a preferred option for emergency care in 37.5%, 77%, and 70%  
189 of villages, respectively. However, the large role of private sector facilities, such as private hospitals and  
190 clinics, in treating severely ill patients in Cambodia, Myanmar, and Yala should also be noted; at these  
191 sites, such facilities are a preferred option for emergency care in 65.0%, 31.4%, and 29.2% of villages,  
192 respectively.

| Country                                                                                          | Thailand                  |                   |                    | Laos                       | Cambodia                             | Myanmar          | Bangladesh                |
|--------------------------------------------------------------------------------------------------|---------------------------|-------------------|--------------------|----------------------------|--------------------------------------|------------------|---------------------------|
| Site (number of villages profiled)                                                               | Chiang Rai province (186) | Tak province (37) | Yala province (24) | Savannakhet province (194) | Battambang and Pailin provinces (81) | Karen state (35) | Chattogram division (130) |
| Number of key informants per village, n                                                          | 1                         | 1                 | 1                  | 1                          | 1                                    | 2                | 2–3                       |
| <b>Demographic details</b>                                                                       |                           |                   |                    |                            |                                      |                  |                           |
| Population per village, n                                                                        | 555 (422, 769)            | 902 (501, 1245)   | 345 (238, 621)     | 750 (486, 1135)            | 639 (417, 1127)                      | 676 (340, 1021)  | 526 (240, 1366)           |
| Households per village, n                                                                        | 180 (129, 234)            | 240 (122, 372)    | 101 (78, 147)      | ND                         | 169 (100, 275)                       | 129 (64, 215)    | 121 (57, 267)             |
| Main languages at site, n                                                                        | 10                        | 4                 | 2                  | 4                          | 1                                    | 8                | 8                         |
| Main religions at site, n                                                                        | 3                         | 4                 | 2                  | 3                          | 2                                    | 6                | 3                         |
| <b>Health and socio-economic indicators</b>                                                      |                           |                   |                    |                            |                                      |                  |                           |
| Number of villages with a health facility within 30 min walk (%)                                 | 105 (56.5)                | 35 (94.6)         | 15 (62.5)          | 55 (28.4)                  | 61 (75.3)                            | 35 (100)         | 114 (87.7)                |
| Longest travel time to closest health facility by motor vehicle if none within 30 min walk (min) | 60                        | 30                | 15                 | ND                         | 90                                   | NA               | 80                        |
| % adults with ≥5 years schooling*                                                                | 75 (65, 100)              | 60 (50, 85)       | 60 (50, 70)        | ND                         | 100 (90, 100)                        | 50 (70, 75)      | 70 (60, 80)               |
| Male                                                                                             | 75 (60, 90)               | 50 (50, 90)       | 50 (45, 55)        |                            | 100 (75, 100)                        | 60 (40, 70)      | 65 (50, 75)               |
| Female                                                                                           | 70 (55, 80)               | 60 (50, 90)       | 70 (65, 75)        |                            | 100 (55, 100)                        | 70 (55, 80)      | 65 (45, 80)               |
| % attended deliveries <sup>§</sup>                                                               | 100 (100, 100)            | 10 (5, 27.5)      | ND                 | ND                         | 100 (100, 100)                       | 80 (47.5, 95)    | 60 (25, 85)               |
| % fully-immunised children <sup>†</sup>                                                          | 100 (100, 100)            | 100 (95, 100)     | 67.5 (58.8, 75)    | ND                         | 100 (100, 100)                       | 75 (85, 95)      | 100 (100, 100)            |
| % latrine coverage <sup>‡</sup>                                                                  | 97.3                      | 83.1              | 92.3               | ND                         | 86.7                                 | 84.8             | 67.5                      |

**Table 1.** Demographic and key health and socio-economic indicator data for rural villages in the South and Southeast Asian Community-based Trials Network by site. Estimates are presented as medians (first quartile, third quartile) and n (%) unless otherwise indicated. \*Completion of at least five years' schooling was used as an indicator of literacy given varying definitions of literacy between countries. <sup>§</sup>A delivery attended by a skilled birth attendant. <sup>†</sup>A child older than one year who has received the following vaccines: Bacille Calmette–Guérin; three doses of diphtheria, tetanus, and pertussis; three doses of measles, and polio. <sup>‡</sup>Proportion of households across all villages at each site which have either flush toilets or latrines. NA, not applicable; ND, data not collected or not available due to local restrictions.

## **Access to public utilities and education**

### ***Water and sanitation***

Thai villages had the best access to improved drinking water sources, with the majority of villages having access to piped water available for at least most of the day (Table 2). Additionally, over half of the villages studied in the Thai provinces of Chiang Rai and Yala were able to obtain bottled water and/or filtered or distilled water via dispensers; in contrast, fewer than 10% of Cambodian and Lao villages were supplied with piped water, with the principal water sources being wells and boreholes (Figure 4a). Overall, however, a higher percentage of villages had access to improved than unimproved drinking water sources, and the majority of villages without piped water had their water sources located within the village (Figure 4a).

Unsurprisingly, the quality of sanitation facilities at each site mirrored the availability of piped water, with the percentage of villages with access to flush toilets being the highest in Chiang Rai (94.6%), and the lowest in Cambodia (13.6%) (Figure 4b). Overall, most villages relied on improved pit latrines (Figure 4b). However, data on whether these were shared/public vs. private were not collected, although it is likely that at least some were shared facilities, especially in Bangladesh where 6.1% of villages were noted to have non-functioning latrines.

### ***Electricity and light sources, and mobile phone coverage***

With the exception of Myanmar, over 60% of villages at each site had access to mains electricity, with the highest penetration being in Yala (100%). Only 5.2% of villages at the Myanmar site were supplied with mains power; at this site, electricity was mainly provided by via generators or solar panels (Figure 5a). However, even in villages with mains power, supply was not always reliable, with the median number of hours per day ranging between six in Myanmar to 24 in Thailand (Table 2).

Regardless of source, electricity was generally available at the profiled villages even if not all households had reliable and affordable access to it, as evident by the continued use of firewood, charcoal, and candles (Figure 5a). The availability of electricity supports the use of mobile phones, evidenced by the widespread signal coverage across all sites (Table 2).

### ***Educational facilities***

Across all sites, the majority of villages had a primary school within 30 minutes' walk (Figure 5b), with an even higher percentage having any type of educational facility within this distance (Table 2). The site with the lowest access to educational facilities was Yala, where 62.5% of villages had a primary school within 30 minutes' walk (vs. 90% in Bangladesh). Furthermore, for villages in Yala with no school within this travel time, the median distance to the nearest school was longest compared to similar villages at all sites at 12.5 km (vs.  $\leq 5$  km at the other sites) (Table 2).



| Country                                                                        | Thailand                  |                   |                    | Laos                       | Cambodia                             | Myanmar          | Bangladesh                |
|--------------------------------------------------------------------------------|---------------------------|-------------------|--------------------|----------------------------|--------------------------------------|------------------|---------------------------|
| Site (number of villages profiled)                                             | Chiang Rai province (186) | Tak province (37) | Yala province (24) | Savannakhet province (194) | Battambang and Pailin provinces (81) | Karen state (35) | Chattogram division (130) |
| <b>Access to public utilities</b>                                              |                           |                   |                    |                            |                                      |                  |                           |
| Number of villages with water available year-round (%)                         | 150 (80.6)                | 32 (86.5)         | 24 (100)           | ND                         | 55 (67.9)                            | 22 (62.9)        | 128 (98.5)                |
| Number of villages with piped water (%)                                        | 141 (75.8)                | 32 (86.5)         | 24 (100)           | 16 (8.2)                   | 8 (9.9)                              | 29 (82.9)        | 34 (26.2)                 |
| Hours/day piped water available*                                               | 24 (24, 24)               | 24 (24, 24)       | 15 (13, 16)        | ND                         | 24 (24, 24)                          | 24 (12, 24)      | 20 (18, 24)               |
| Number of villages without piped water but with intra-village water source (%) | 40 (21.5)                 | 3 (8.1)           | NA                 | ND                         | 65 (80.2)                            | 4 (11.4)         | 95 (73.1)                 |
| Number of villages with mains power (%)                                        | 179 (96.2)                | 24 (64.9)         | 24 (100)           | ND                         | 63 (77.8)                            | 2 (5.7)          | 115 (88.5)                |
| Hours/day mains power available <sup>§</sup>                                   | 24 (24, 24)               | 24 (18, 24)       | 24 (24, 24)        | ND                         | 24 (24, 24)                          | 6 (3.5, 15)      | 18 (17.5, 20)             |
| Number of villages with mobile phone signal (%) <sup>†</sup>                   | 186 (100)                 | 26 (70.3)         | 20 (83.3)          | 194 (97.8)                 | 81 (100)                             | 35 (100)         | 128 (98.5)                |
| <b>Access to education</b>                                                     |                           |                   |                    |                            |                                      |                  |                           |
| Number of villages with a school within 30 min walk (%)                        | 177 (95.2)                | 37 (100)          | 20 (83.3)          | 181 (93.2)                 | 62 (76.5)                            | 32 (91.4)        | 125 (96.2)                |
| Distance to nearest school if not within 30 min walk, km                       | 4.0 (2.0, 9.0)            | NA                | 12.5 (9.3, 15.0)   | 4.0 (2.0, 5.0)             | 5.0 (2.9, 10.3)                      | 3.3 (2.6, 6.7)   | 5.0 (4.0, 6.0)            |

**Table 2.** Access to public utilities and education for rural villages in the South and Southeast Asian Community-based Trials Network by site. The number of hours per day piped water and mains power were available, and distance to nearest school if not within 30 minutes' walk, are presented as median (first quartile, third quartile). \*For villages with piped water. <sup>§</sup>For villages with mains power. <sup>†</sup>Defined as mobile phone signal present at least some of the time. NA, not applicable; ND, data not collected or available due to local restrictions.

## Discussion

This study profiled 687 villages located in five South and Southeast Asian low-income and middle-income countries (LMICs) at different stages of development, revealing very different characteristics, especially in terms of access to services and public utilities. In line with this, therefore, there was considerable variation between sites in terms of health and socio-economic indicators.

Nevertheless, several common themes were evident, the first being the obvious ethno-cultural and linguistic diversity that exists even within villages at the same site. The second is their reliance on PHCs (and analogous NGO primary health clinics), and VHWs/VMWs, as the backbone of primary healthcare provision. The latter are particularly common in Thailand, Laos, Bangladesh, and Cambodia where they have been a longstanding feature of village healthcare over the past decades. However, severely ill patients would generally travel out of their villages to seek care at first-level referral hospitals and private sector facilities in towns, bypassing village-level health services. Thirdly, while most villages were proximate to a primary school, the level of education was generally low. Fourthly, mobile phone coverage and availability of electricity was generally high.

Several findings require further explanation. Firstly, the low vaccine coverage in Myanmar and Yala may partially be explained by these locations being conflict zones,[10, 17] with an additional layer of mistrust of the government and, by extension, government programmes by the majority Malay ethnic group in Yala.[17] Furthermore, the low coverage of villages by public sector PHCs in Myanmar is due to the traditionally meagre government expenditure on healthcare,[18] encouraging a parallel system of primary health clinics set up by NGOs to meet demand. This is especially so in Karen State where control by the central government has been patchy.[19] Lastly, while not all villages were supplied by electricity through power grids and, even in those that were, the number of hours per day that such supply is available is limited yet mobile phone coverage was high across all sites. This is due to innovative solutions having been devised to overcome the lack of private household electricity supply, such as grocery shops installing shared solar-powered mobile phone charging points in villages in Myanmar.[20]

The principal strength of this study is its focus on key health and socio-economic indicators, data on which public health and other policymakers, as well as researchers, can use for planning purposes. Furthermore, a pragmatic, low-cost, semi-desk-based methodology using key informants was chosen. This approach allowed reasonable estimates of the key indicators in the absence of easily accessible official information for all domains, in addition to the difficulties posed by the remote locations of many villages and travel restrictions for security reasons to some e.g., those in the Chattogram Hill Tracts in Bangladesh. It also has the benefit of allowing high-quality spatially granular data to be collected, permitting detailed comparisons to be made. The key informants were selected by staff of SEACTN country partner organisations to ensure a high degree of first-hand knowledge of the prevailing conditions in their respective villages, as is best practice.[21] This approach is well-suited to the objectives of this study, as it is appropriate if general, descriptive information is sufficient to guide decision-making, generate suggestions and recommendations, and assist in the design of more comprehensive quantitative research.[22] Key informant interviews are also appropriate for when quantitative data collected through other methods need to be interpreted,[22] which is exactly the situation with SEACTN where the data from the observational epidemiological studies being conducted at these sites need to be viewed through a contextual prism.[23]

Nevertheless, while the results provide an idea of the characteristics of villages at the individual sites, they may not be generalisable to all rural villages within their respective countries. This is amply demonstrated by heterogeneity of the three Thai sites, despite all being located in remote areas bordering neighbouring countries; there are likely to be many more differences between these borderland villages and those in the more developed central plains. In the case of Cambodia, the relative ethno-linguistic homogeneity and high elementary educational attainment of the villages profiled for this study would not likely be found in villages in the northeast of the country bordering Laos, where more languages are spoken and literacy rates lower.[24] The selected villages at the Myanmar site had better road and telecommunication links than others due to the logistical and security considerations previously described. This is likely to have resulted in better access to water and sanitation, health services, and educational facilities, which may not be representative of the typical conditions elsewhere in Karen state or Myanmar in general. For example, there is an international hospital in Shwe Kokko close to several villages profiled at the Myanmar site, whereas no such facilities exist deeper in the interior of Karen state. Also, the higher immunisation coverage in these villages compared to the very low or negligible figures reported for villages elsewhere in Karen state,[25] is likely due to the ability of residents to access the more advanced health services in Thailand, including preventative care, as mentioned earlier.

Additionally, there are several well-known limitations of the key informant interview approach that should be borne in mind when interpreting the results of this study. Chief of these is the potential for bias since it was not possible to confirm the appropriateness of informant selection; for example, more qualified but less visible or prominent informants may not have been selected.[26] It is also possible that, due to their prominence, the socio-demographic strata from which key informants are drawn may not be similar to that of the majority of village dwellers, in particular those from the most marginalised groups, leading to a perhaps less than comprehensive understanding of their villages. This should be taken into account when interpreting the results, since their potentially differing perspectives may have caused them to overestimate their responses to questions on health and socio-economic indicators. It is particularly important to consider this effect at the Myanmar site since, added to that of the relatively better access to services of the profiled villages at this site, it may have resulted in results which are less representative of more typical villages there. Another source of bias that should be considered is interviewer bias, although this was mitigated by using a data collection tool with questions to be read out verbatim by the interviewer, as well as having many questions with response options or which required numerical responses. However, the questions which required quantitative responses were in themselves a weakness, since key informant interviews are best suited to qualitative studies because they provide only a very restricted basis for quantification.[22] It is also difficult to verify the validity of the findings because only a very small number of informants were selected per village, certainly fewer than the ideal figure of 15–35.[26] A final limitation of this study is that while it may indicate the presence or absence of particular facilities or services, it gives no indication of their quality.[27]

There are two obvious priorities for further research. The first is to flesh out the findings with the results of other studies examining broadly similar themes, such as the SEACTN household health survey.[28] In addition, more detailed site-specific analyses triangulating the findings of this study with geospatial epidemiological work analysing accessibility to health and other services will be extremely informative. Such efforts will allow further layers of contextual understanding to be built on the foundations established by this study. Secondly, this study has uncovered the major public health and socio-

economic issues important to each site, for example the low vaccination rates in Yala province, the low percentage of births attended by skilled attendants in Bangladesh, and the globally poor levels of educational attainment despite relatively easy physical access to primary schools. Future studies should explore the reasons behind such problems in the light of the other contextual findings, with a view to developing potential interventions to solve these issues.

## **Conclusion**

This study provides a rudimentary descriptive overview of the characteristics of under-served and under-studied villages in rural South and Southeast Asia, focusing on key health and socio-economic indicators and the availability and accessibility of amenities and public services essential to good health, such as water and sanitation. Notwithstanding its weaknesses, the results illustrate the wide diversity in the region and this should be considered in public health research and policymaking.

## **Funding**

This research was funded in whole, by the Wellcome Trust [220211/Z/20/Z and 215604/Z/19/Z]. RC was also funded by the UK Government through a Commonwealth Scholarship, the Royal Australasian College of Physicians through the Bushell Travelling Fellowship in Medicine or the Allied Sciences, and the Rotary Foundation through a Global Grant Scholarship.

The funders had no role in study design, data collection, data analysis, data interpretation, or writing of the manuscript. All authors had full access to the data and had final responsibility for the decision to submit the manuscript for publication. For the purpose of open access, the authors have applied a CC BY public copyright license to any Author Accepted Manuscript version arising from this submission.

## **Competing interests**

The authors declare no competing interests.

## **Data availability**

All data relevant to the study are included in the article or available upon reasonable request from the corresponding author.

## **References**

1. Rogers L, De Brún A, McAuliffe E. Defining and assessing context in healthcare implementation studies: a systematic review. *BMC Health Serv Res.* 2020;20:591. doi: 10.1186/s12913-020-05212-7.
2. Johns G. The essential impact of context on organisational behaviour. *Acad Manag Rev.* 2006;31(2):386-408. doi: 10.5465/AMR.2006.20208687.
3. Bate P. Context is everything. *Perspectives on context: A selection of essays considering the role of context in successful quality improvement.* London, UK: Health Foundation; 2014. p. 1-30.
4. Singh PK, Cassels A, Travis P. *Primary Health Care at forty: reflections from South-East Asia.* Geneva, Switzerland: World Health Organization; 2018.
5. Treleaven E, Pham TN, Le DN, Brooks TN, Le HT, Partridge JC. Referral patterns, delays, and equity in access to advanced paediatric emergency care in Vietnam. *Int J Equity Health.* 2017;16(1):215. doi: 10.1186/s12939-017-0703-y.
6. Satia JK, Mavalankar DV, Sharma B. Micro-level planning using rapid assessment for primary health care services. *Health Policy Plan.* 1994;9(3):318-30. doi: 10.1093/heapol/9.3.318.

7. King MH, Martodipoero S. Health microplanning in the developing countries: a systems approach to appropriate technology. *Int J Health Serv.* 1978;8(4):653-64. doi: 10.2190/ATDG-DLRW-UCKU-1RLF.
8. Larson C, Mercer A. Global health indicators: an overview. *CMAJ.* 2004;171(10):1199-200. doi: 10.1503/cmaj.1021409.
9. Chandna A, Chew R, Shwe Nwe Htun N, Peto TJ, Zhang M, Liverani M, et al. Defining the burden of febrile illness in rural South and Southeast Asia: an open letter to announce the launch of the Rural Febrile Illness project. *Wellcome Open Res.* 2022;6(64). doi: 10.12688/wellcomeopenres.16393.2.
10. Davis WW, Mullany LC, Shwe Oo EK, Richards AK, Iacopino V, Beyrer C. Health and Human Rights in Karen State, Eastern Myanmar. *PLoS One.* 2015;10(8):e0133822. doi: 10.1371/journal.pone.0133822.
11. Atting IA, Egwu IN. Indicators of accessibility to primary health care coverage in rural Odukpani, Nigeria. *Asia Pac J Public Health.* 1991;5(3):211-6. doi: 10.1177/101053959100500304.
12. World Health Organization. Births attended by skilled health personnel Geneva, Switzerland: World Health Organization; 2024 [2024 Jan 24]. Available from: <https://www.who.int/data/nutrition/nlis/info/births-attended-by-skilled-health-personnel>.
13. World Health Organization. Improved sanitation facilities and drinking-water sources. Geneva, Switzerland: World Health Organization; 2024 [11 July 2024]. Available from: <https://www.who.int/data/nutrition/nlis/info/improved-sanitation-facilities-and-drinking-water-sources>.
14. Bosanac EM, Parkinson RC, Hall DS. Geographic access to hospital care: a 30-minute travel time standard. *Med Care.* 1976;14(7):616-24. doi: 10.1097/00005650-197607000-00006.
15. Sherman JE, Spencer J, Preisser JS, Gesler WM, Arcury TA. A suite of methods for representing activity space in a healthcare accessibility study. *Int J Health Geogr.* 2005;4:24. doi: 10.1186/1476-072X-4-24.
16. Thitu A, Kaseje M, Afullo A. Factors Influencing Latrine Coverage among the Maasai of Ildamat Location Kajiado District Dev Country Stud. 2016;6(11):22-7.
17. Chieu NV. The Religious and Ethnic Issues in Thailand: Impacts to Sustainability in South East Asian and Implications for Vietnam. *Adv Soc Sci Res J.* 2018;5(11):539-46. doi: 10.14738/assrj.511.5682.
18. Khaing IK, Malik A, Oo M, Hamajima N. Health care expenditure of households in Magway, Myanmar. *Nagoya J Med Sci.* 2015;77(1-2):203-12.
19. Oh S-A. Competing forms of sovereignty in the Karen state of Myanmar. Singapore: Institute of Southeast Asian Studies, 2013.
20. GSM Association (GSMA). The typical Myanmar rural off-grid energy consumer is more advanced than we think. London, UK: GSM Association (GSMA); 2017 [11 July 2024]. Available from: <https://www.gsma.com/solutions-and-impact/connectivity-for-good/mobile-for-development/programme/digital-utilities/the-typical-myanmar-rural-off-grid-energy-consumer-is-more-advanced-than-we-think/>.
21. Marshall MN. The key informant technique. *Fam Pract.* 1996;13(1):92-7.
22. USAID Center for Development Information and Evaluation. Conducting key informant interviews. *Perf Monit Eval TIPS.* 1996;(2):1-4.
23. Minary L, Alla F, Cambon L, Kivits J, Potvin L. Addressing complexity in population health intervention research: the context/intervention interface. *J Epidemiol Community Health.* 2018;72(4):319-23. doi: 10.1136/jech-2017-209921.
24. Gregerson MJ. Learning to read in Ratanakiri: a case study from northeastern Cambodia. *Int J Biling Educ Biling.* 2009;12(4):429-47. doi: 10.1080/13670050902935789.
25. Aung AP. Vaccine vacuum afflicts children in Myanmar's conflict zones. *Frontier Myanmar.* 2024 Feb.

26. Kumar K. Conducting Key Informant Interviews in Developing Countries: A.I.D. Program Design and Evaluation Methodology Report No. 13. Washington DC, USA: US Agency for International Development, 1989.
27. Kruk ME, Gage AD, Arsenault C, Jordan K, Leslie HH, Roder-DeWan S, et al. High-quality health systems in the Sustainable Development Goals era: time for a revolution. *Lancet Glob Health*. 2018;6(11):e1196-e252. doi: 10.1016/S2214-109X(18)30386-3.
28. Zhang M, Htun NSN, Islam S, Sen A, Islam A, Neogi AK, et al. Defining the hidden burden of disease in rural communities in Bangladesh, Cambodia and Thailand: a cross-sectional household health survey protocol. *BMJ Open*. 2024;14(3):e081079. doi: 10.1136/bmjopen-2023-081079.

## Figure legends

**Figure 1.** Locations of study sites in the South and Southeast Asian Community-based Trials Network and the number of villages profiled at each site.

**Figure 2.** Locations of profiled villages within each study site of the South and Southeast Asian Community-based Trials Network.

**Figure 3.** Percentages of villages in South and Southeast Asian Community-based Trials Network Rural Febrile Illness project study sites with access to different types of (a) healthcare worker and (b) healthcare facility. Percentages of villages and the types of healthcare facilities at which patients perceived as being severely ill from those villages would seek care are shown in (c). Access was defined as having the healthcare worker or facility in the village or within 30 minutes' walk. NGO, non-governmental organisation; VHW/VMW, village health worker/village malaria worker.

**Figure 4.** Percentages of villages in South and Southeast Asian Community-based Trials Network Rural Febrile Illness project study sites with access to different types of (a) water supply sources and (b) sanitation facilities. Access was defined as having the water source or sanitation facility in the village or within 30 minutes' walk.

**Figure 5.** Percentages of villages in South and Southeast Asian Community-based Trials Network Rural Febrile Illness project study sites with access to different types of (a) power and light sources and (b) educational facilities. Access to power and light sources was defined as having the power and light source in the village, while access to educational facilities was defined as having the facility in the village or within 30 minutes' walk.

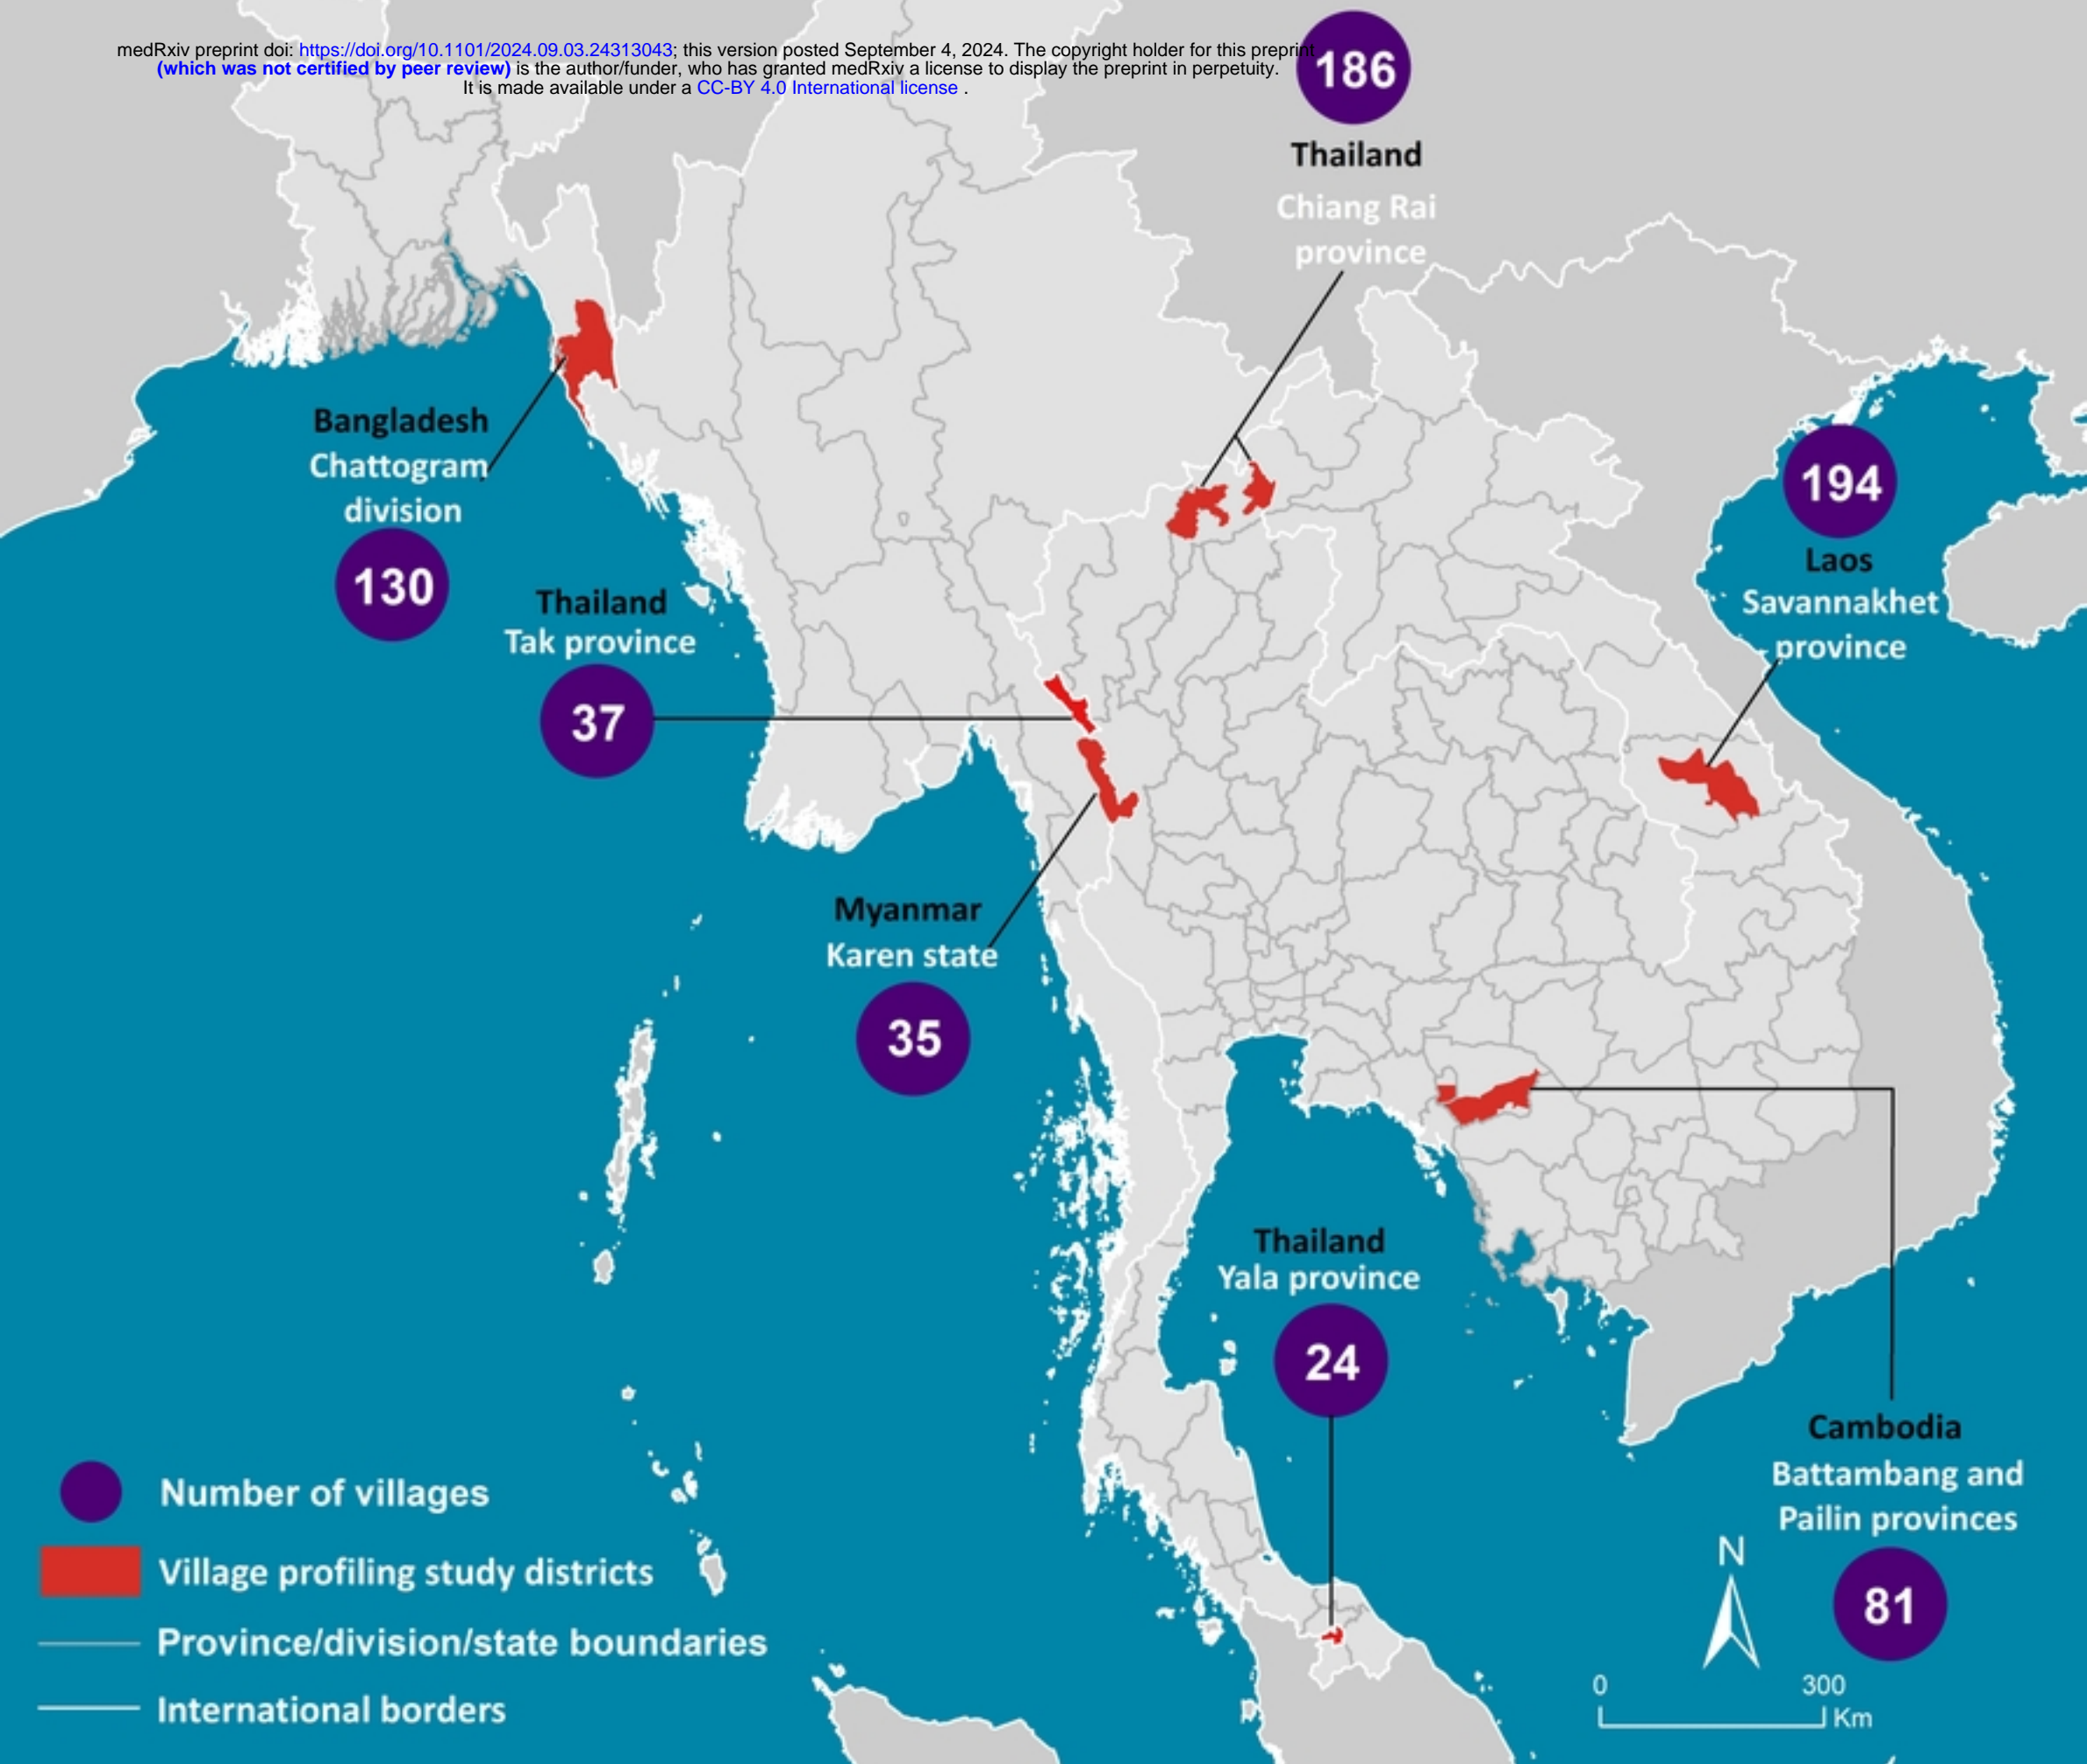

Figure 1



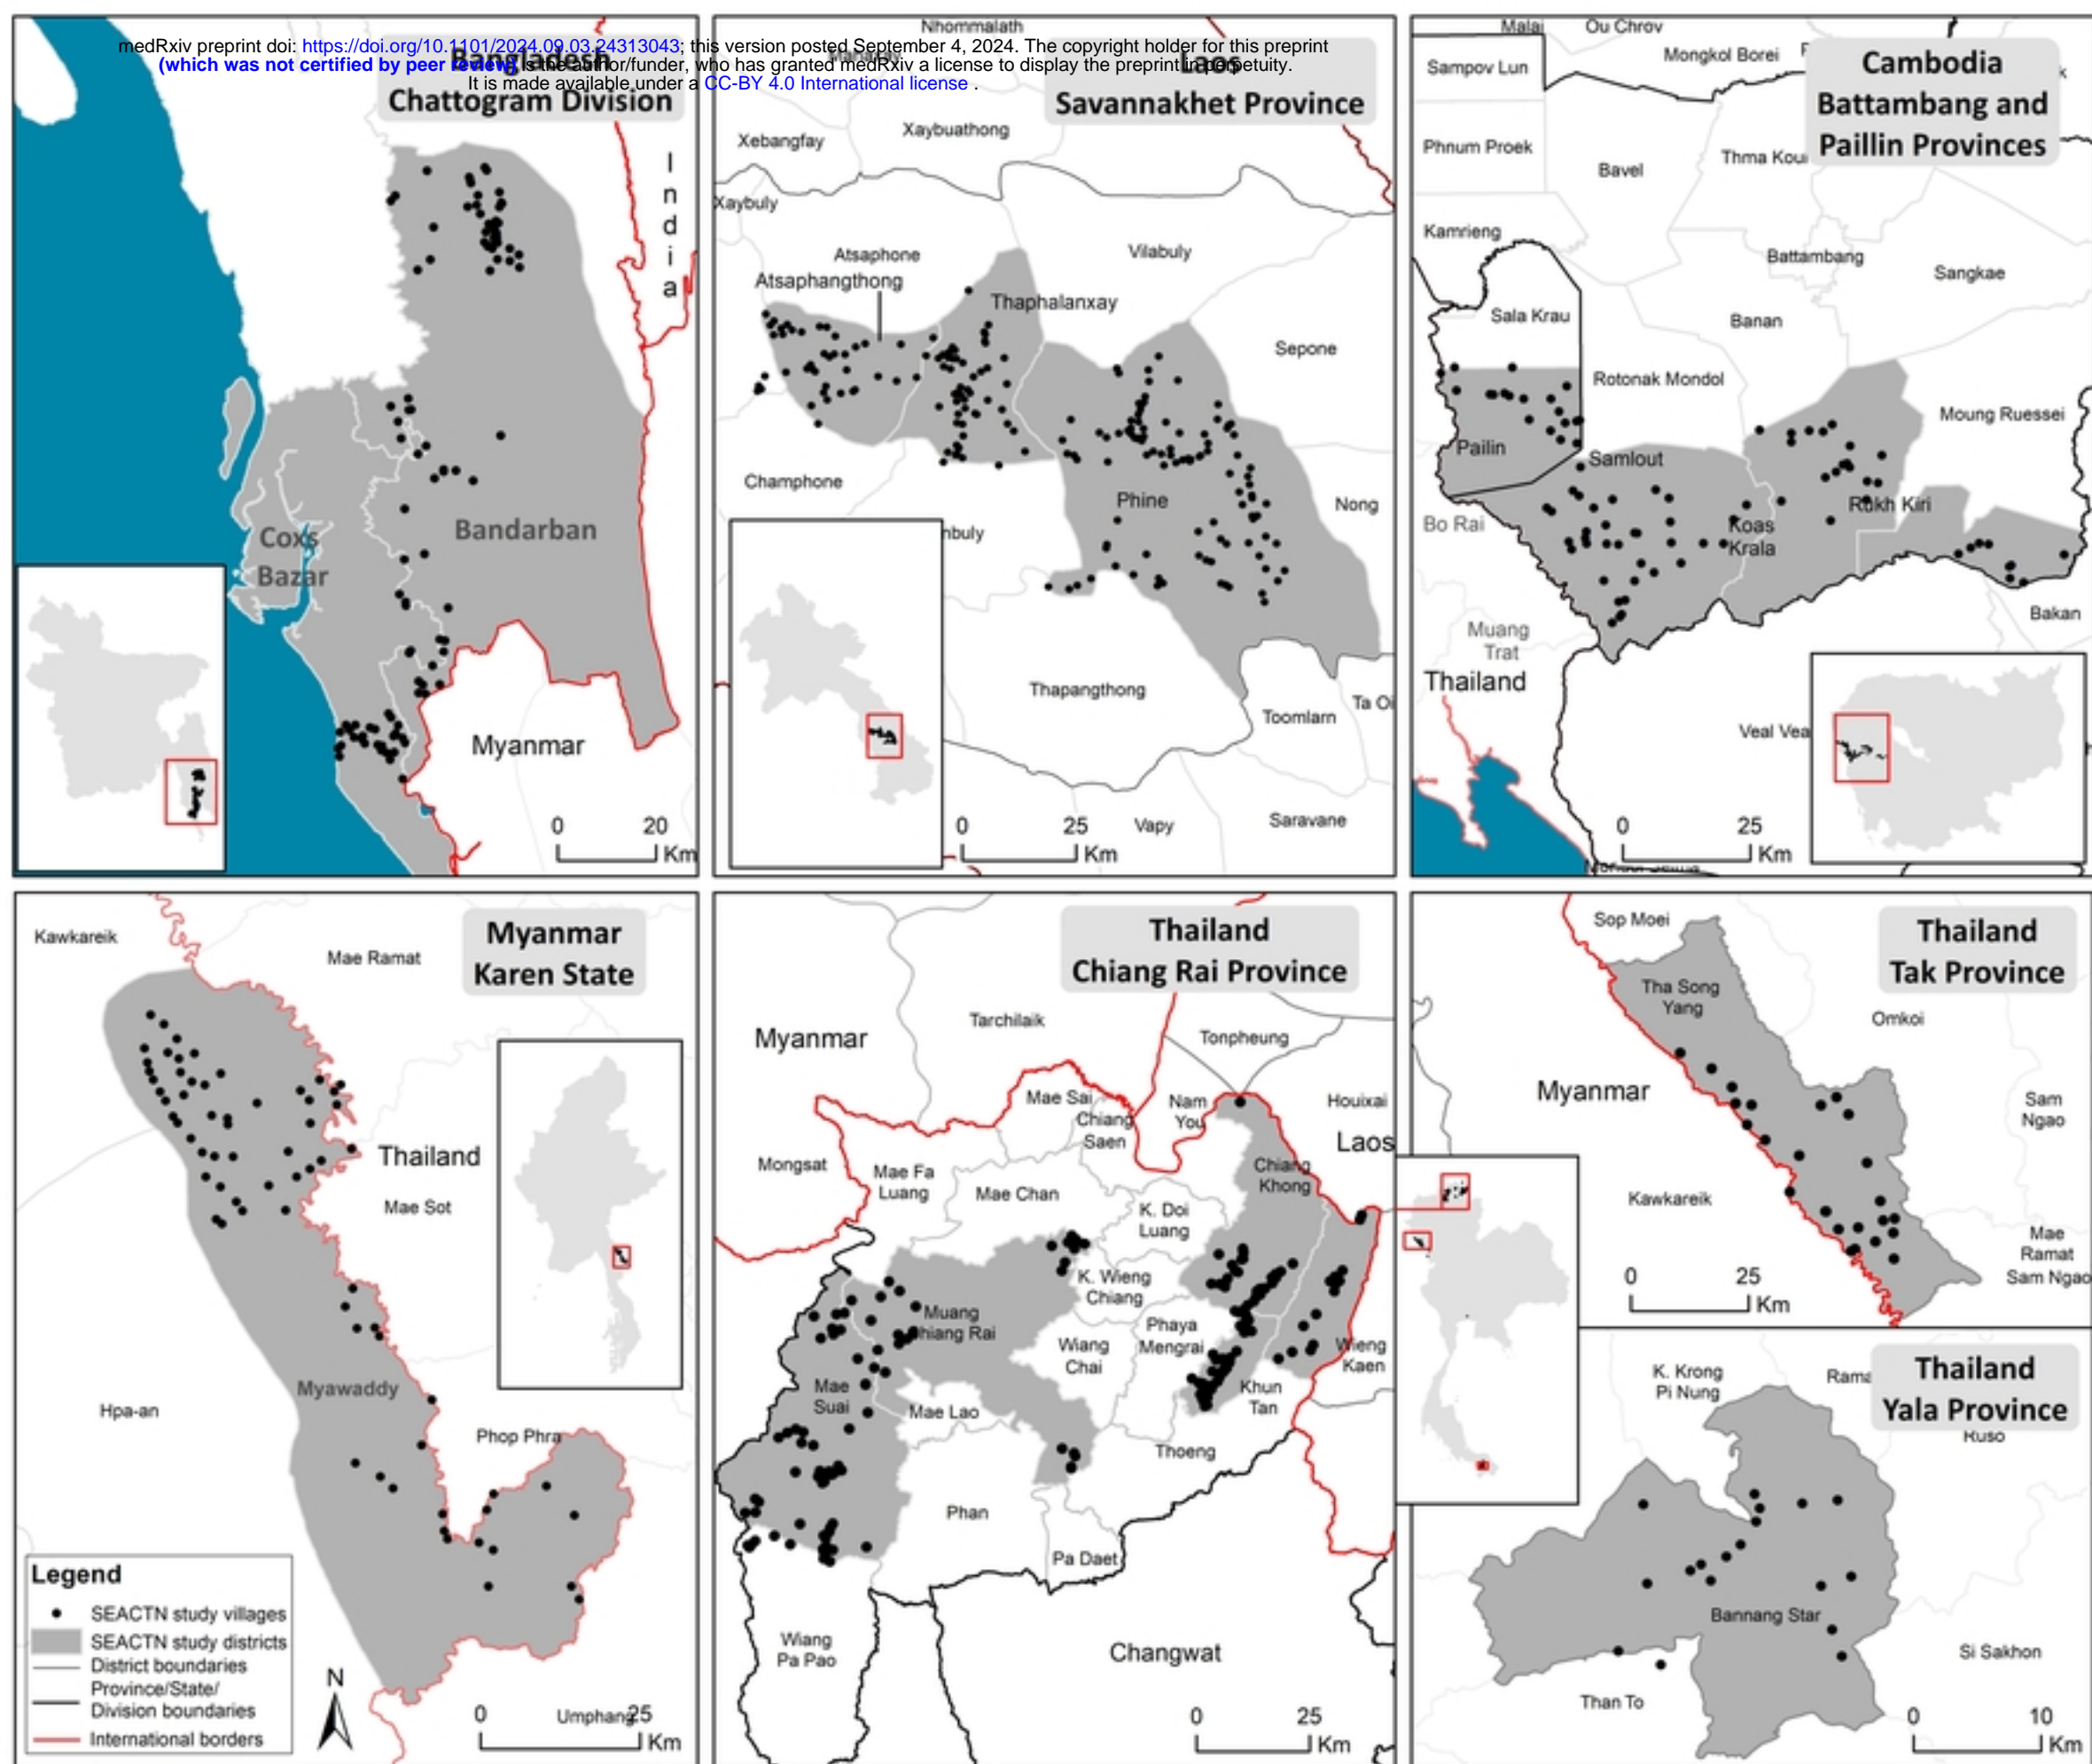

Figure 2

### a Access to health workers

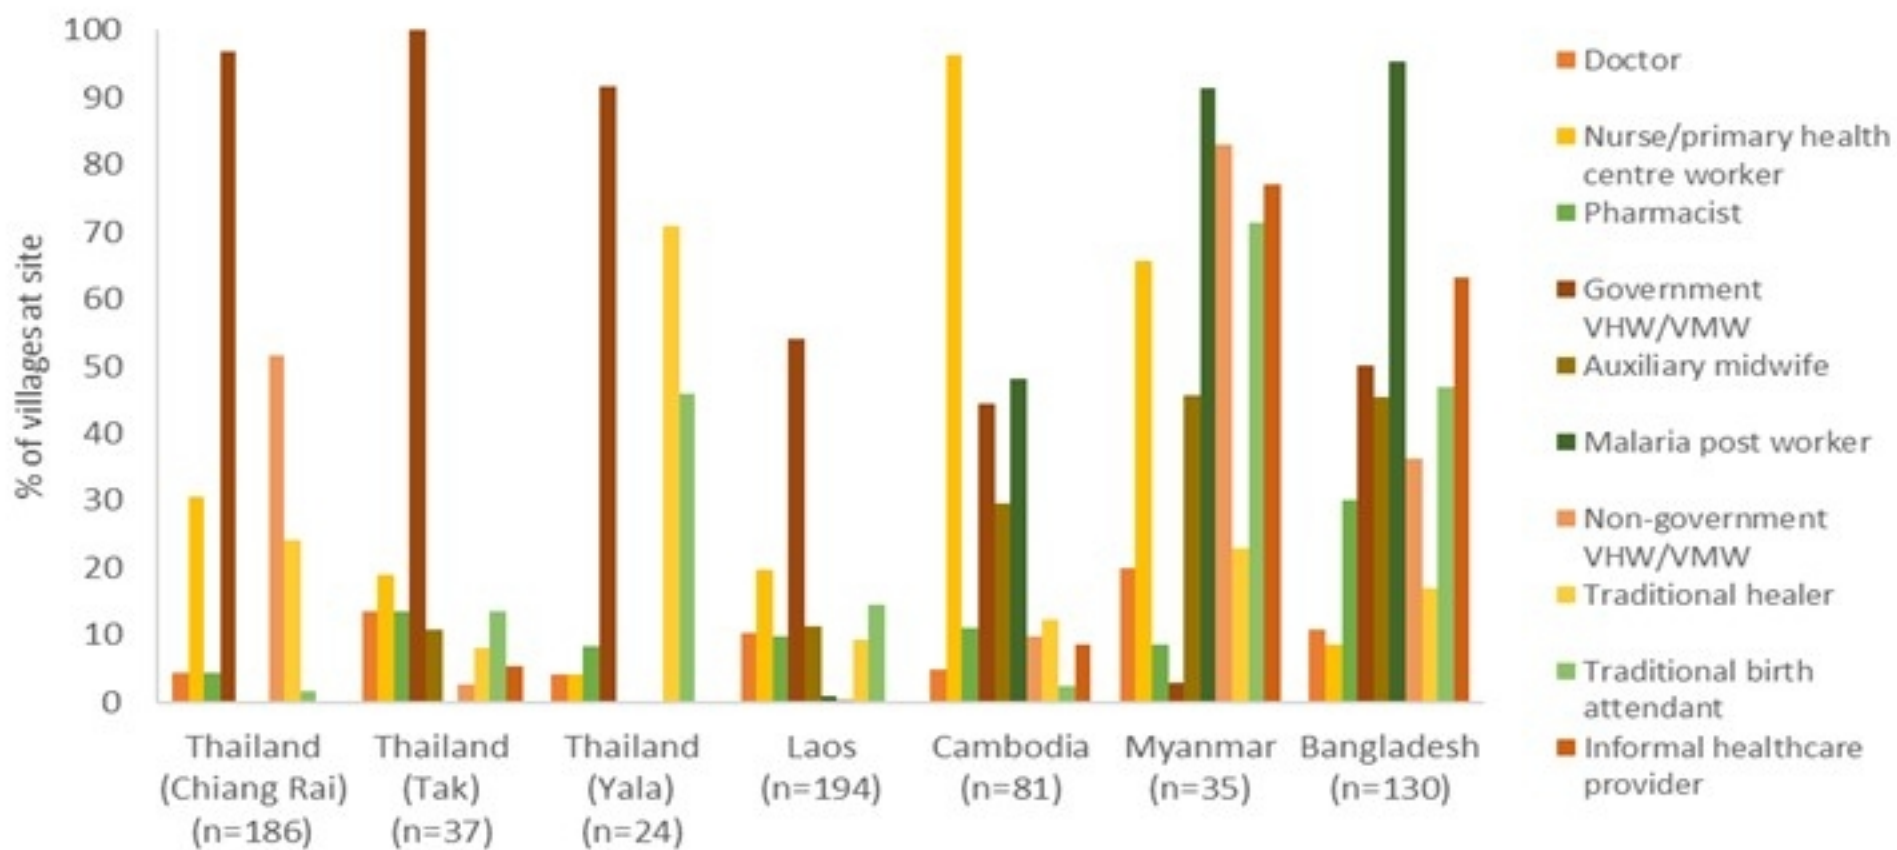

### b Access to health facilities

medRxiv preprint doi: <https://doi.org/10.1101/2024.09.03.24313043>; this version posted September 4, 2024. The copyright holder for this preprint (which was not certified by peer review) is the author/funder, who has granted medRxiv a license to display the preprint in perpetuity. It is made available under a [CC-BY 4.0 International license](https://creativecommons.org/licenses/by/4.0/).

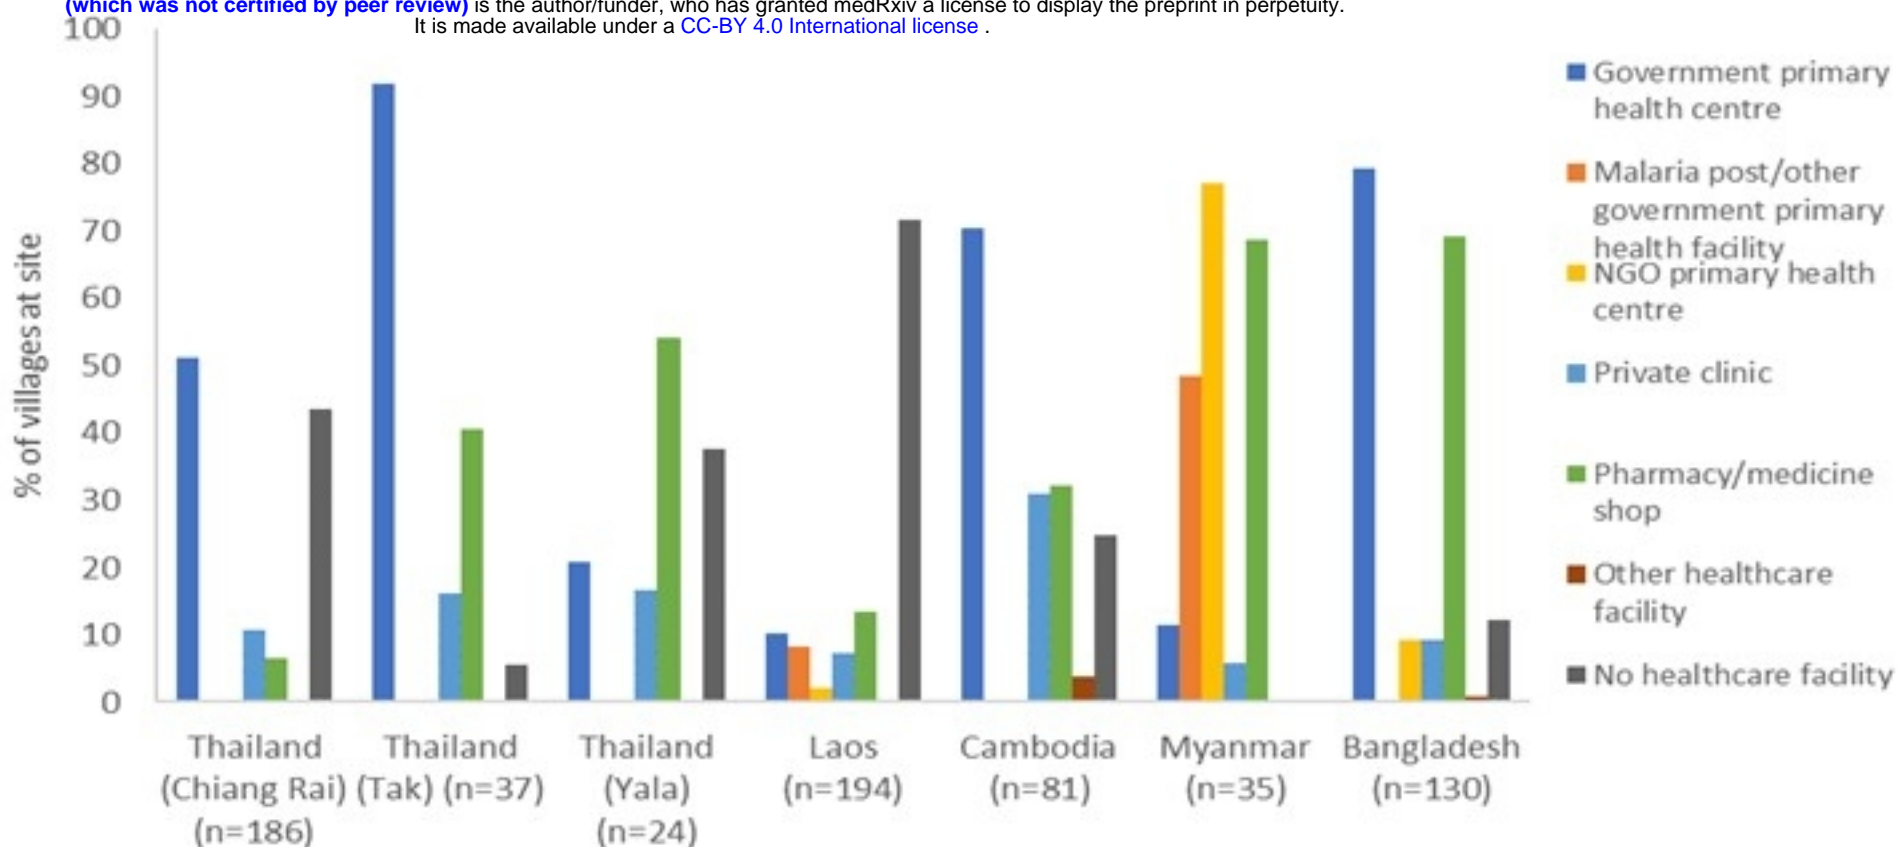

### c Preferred health facilities for emergency care

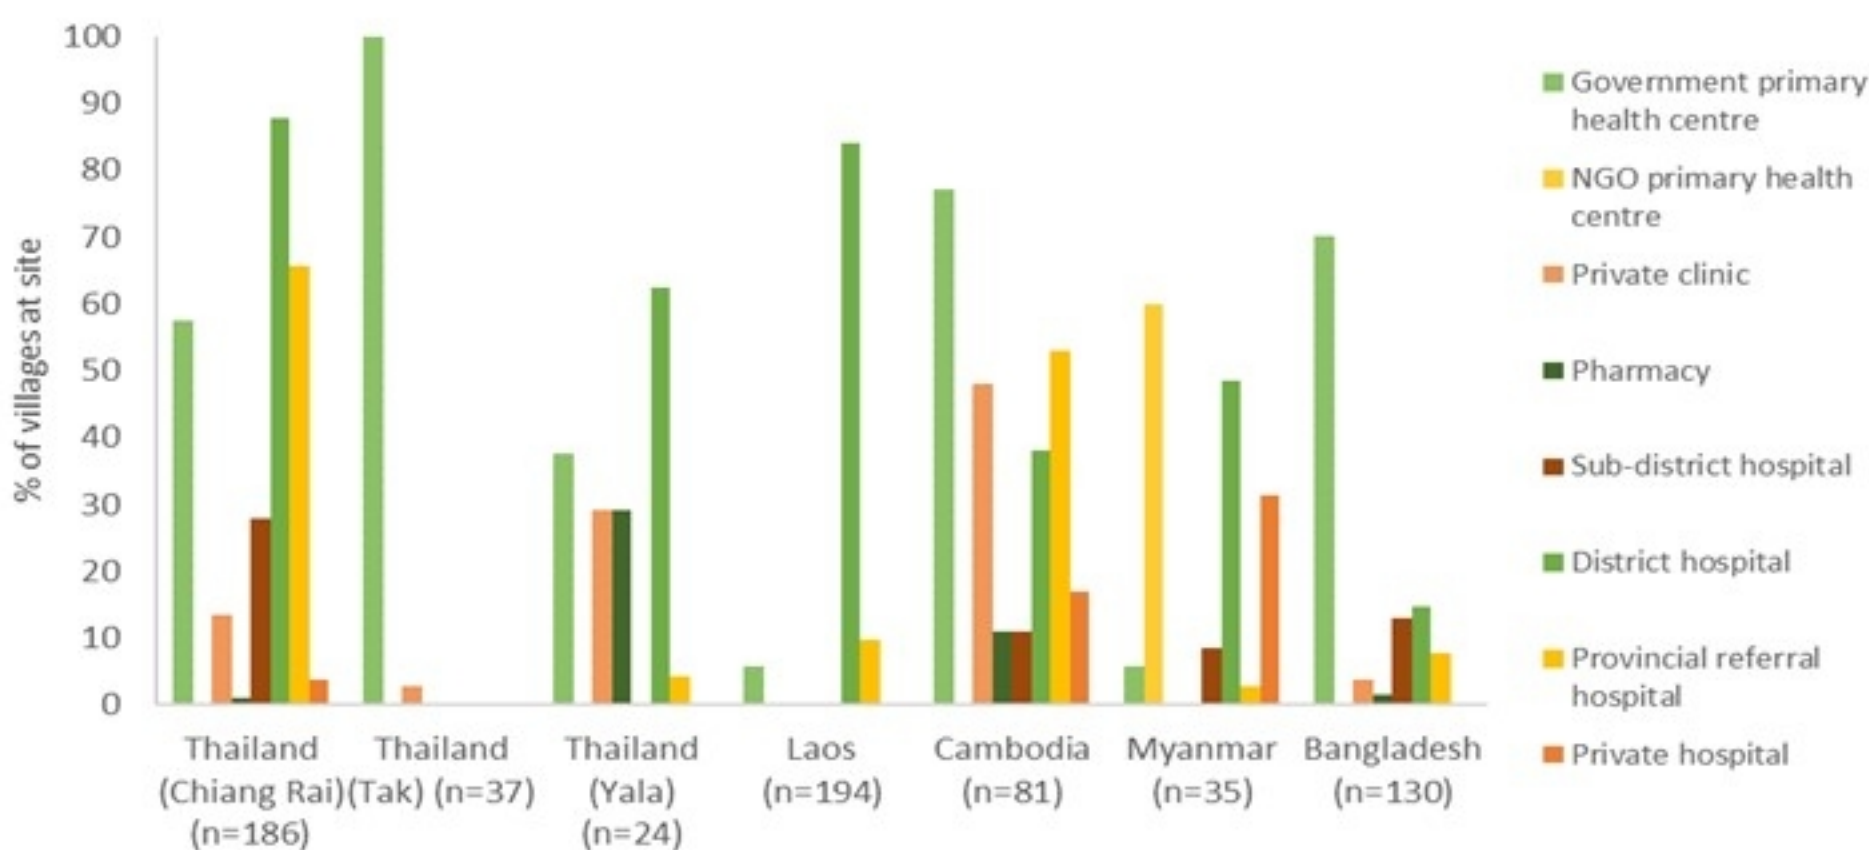

Figure 3

## a Access to water supply sources

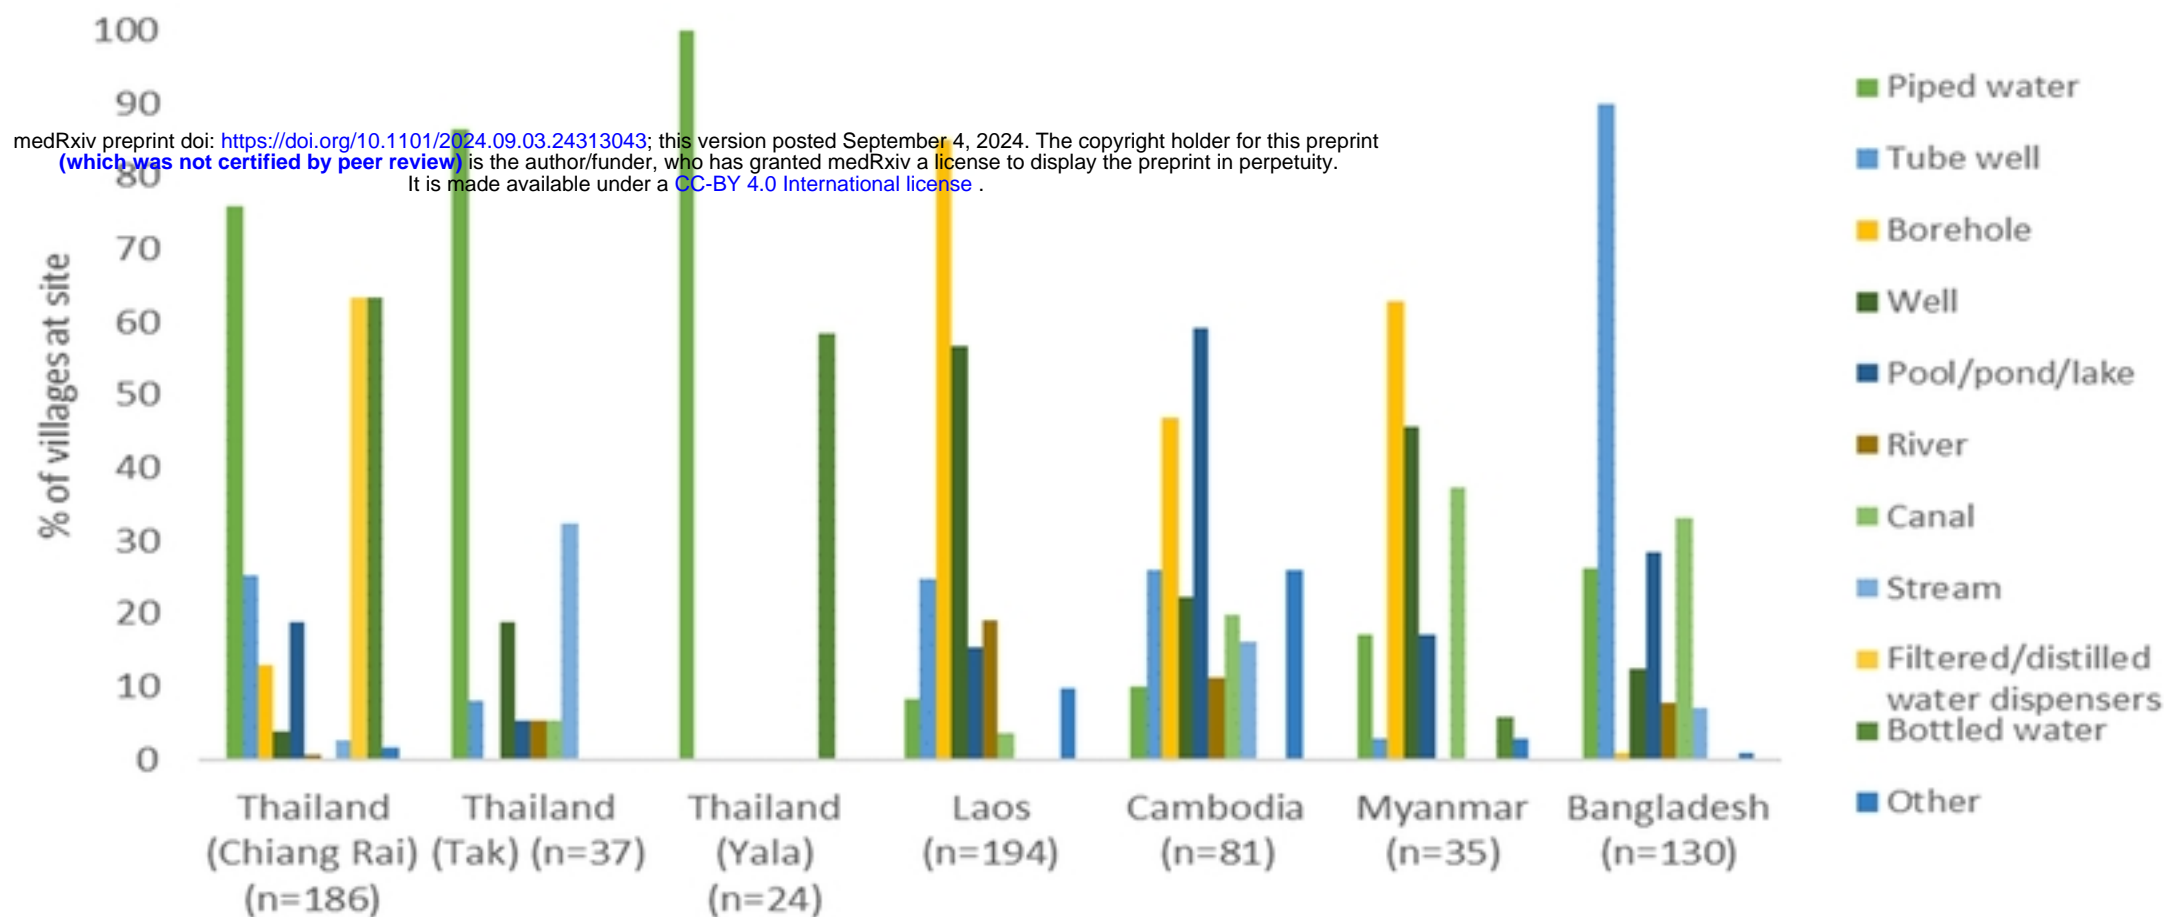

## b Access to sanitation facilities

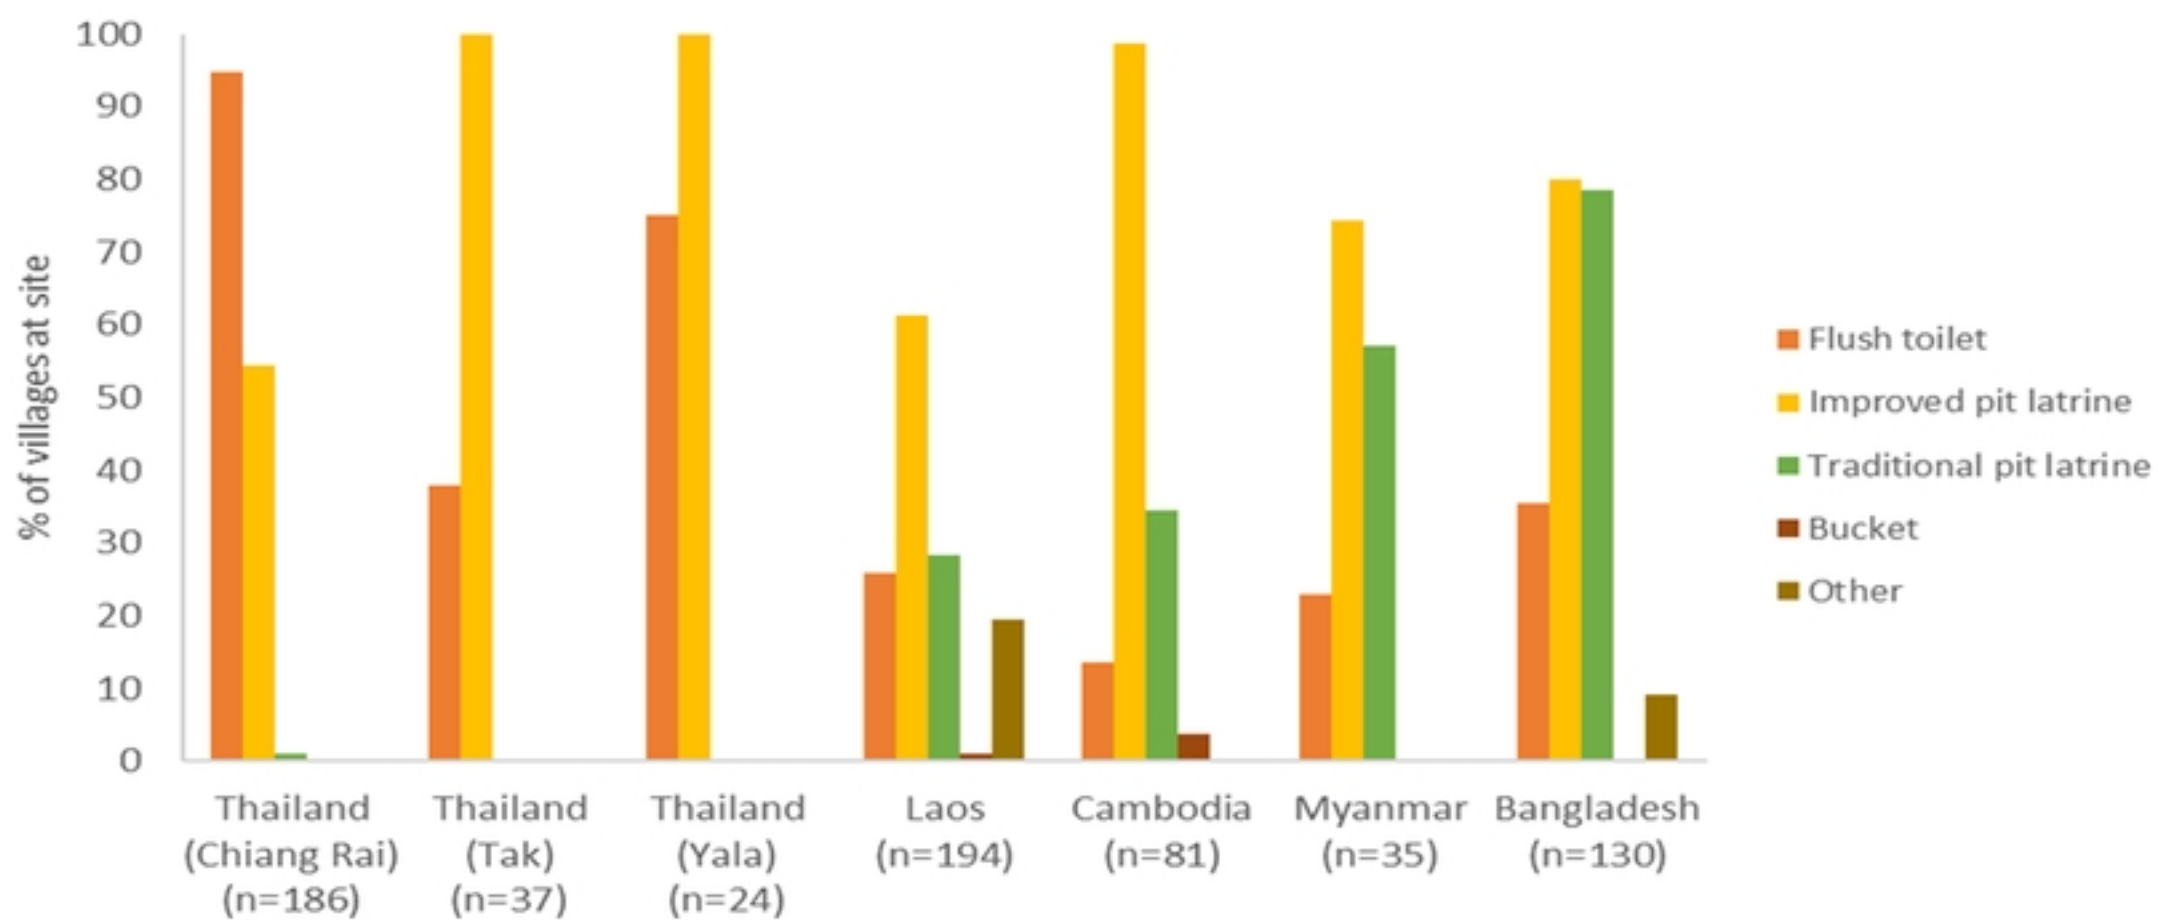

Figure 4

## a Access to power and light sources

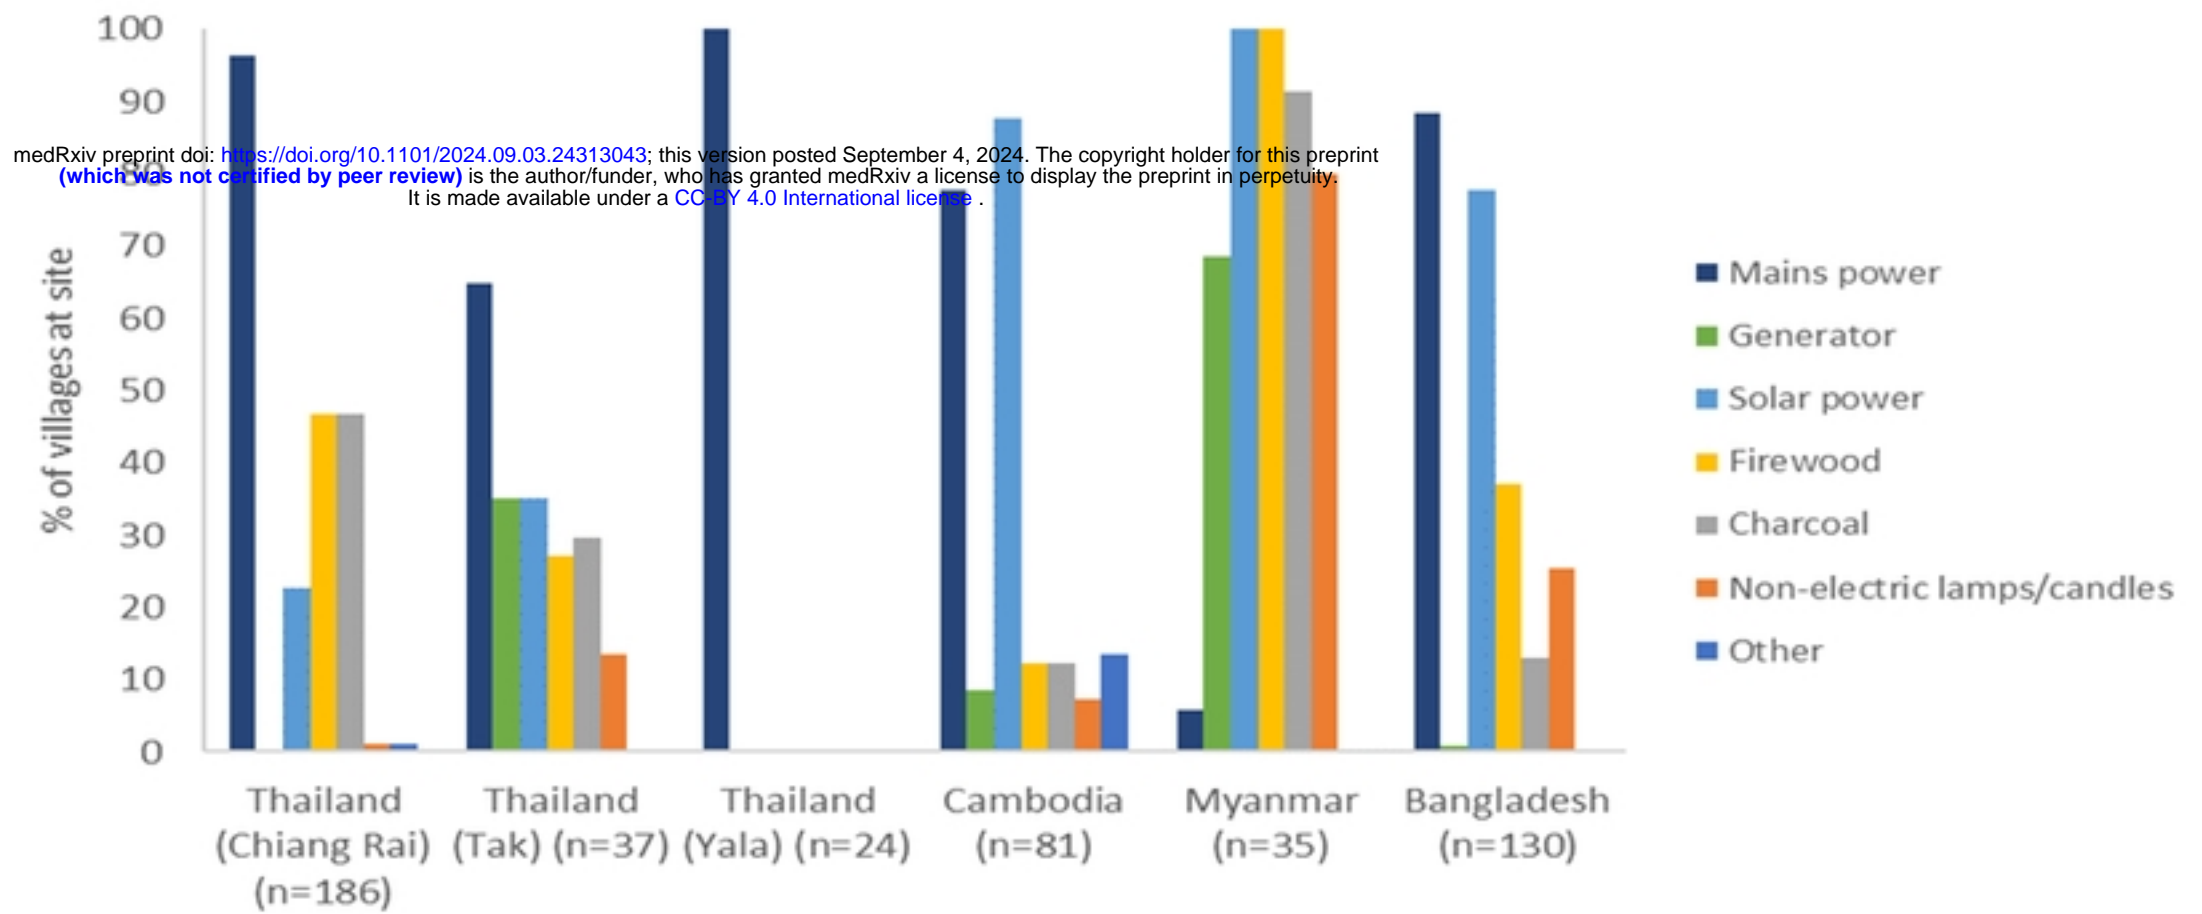

## b Access to educational facilities

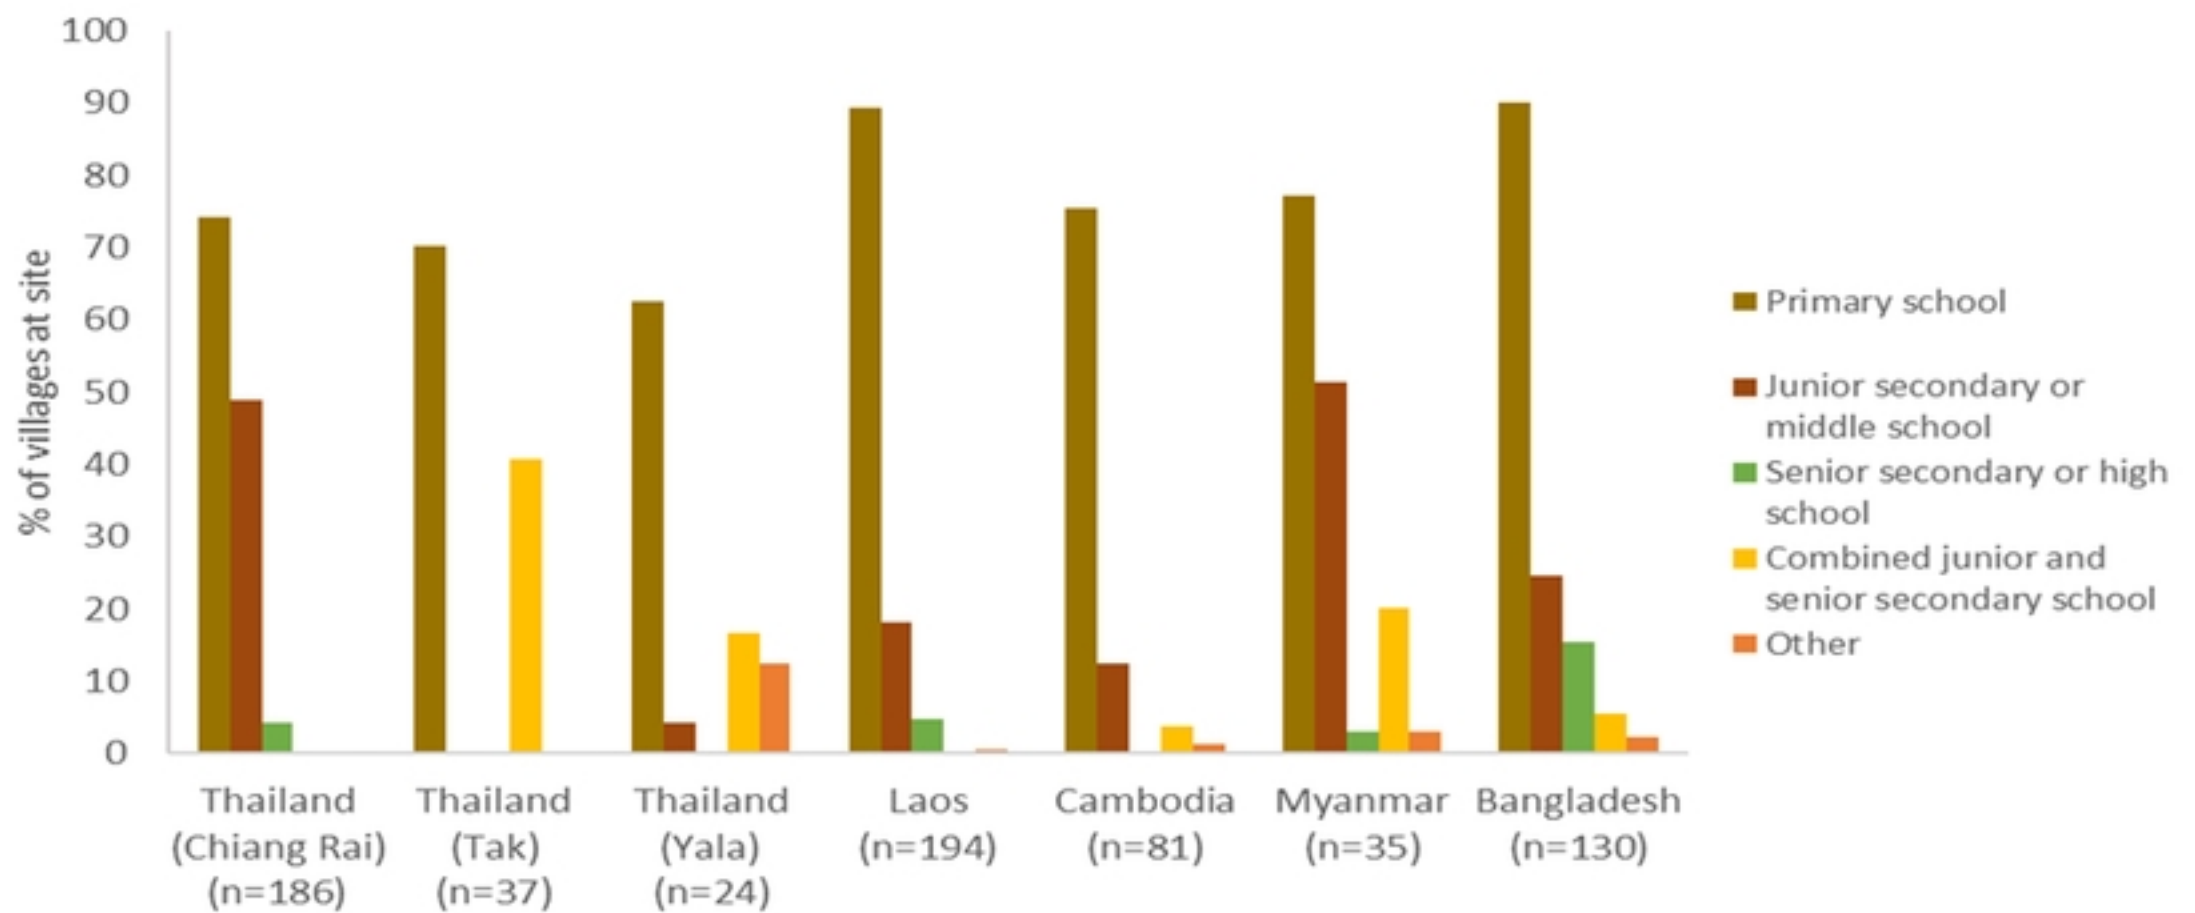

Figure 5
